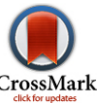

## Correction

# Correction: Different Patterns of Punctate White Matter Lesions in Serially Scanned Preterm Infants

**The PLOS ONE Staff**

An affiliation for the 2<sup>nd</sup> author is missing. Manon J. N. L. Benders is also affiliated with: Centre for the Developing Brain, Division of Imaging Sciences and Biomedical Engineering, King's College London and King's Health Partners, St. Thomas' Hospital, London, United Kingdom.

**Reference**

1. Kersbergen KJ, Benders MJNL, Groenendaal F, Koopman-Esseboom C, Nievelstein RAJ, et al. (2014) Different Patterns of Punctate White Matter Lesions in Serially Scanned Preterm Infants. PLoS ONE 9(10): e108904. doi:10.1371/journal.pone.0108904

**Citation:** The PLOS ONE Staff (2014) Correction: Different Patterns of Punctate White Matter Lesions in Serially Scanned Preterm Infants. PLoS ONE 9(11): e114704. doi:10.1371/journal.pone.0114704

**Published:** November 26, 2014

**Copyright:** © 2014 The PLOS ONE Staff. This is an open-access article distributed under the terms of the Creative Commons Attribution License, which permits unrestricted use, distribution, and reproduction in any medium, provided the original author and source are credited.
